# Supplementary material for: pH-Sensitive magnetite mesoporous silica nanocomposites for controlled drug delivery and hyperthermia
Source: Royal Society of Chemistry journal article supplement (doi:10.1039/d0ra06916g), 2020-01-01
Supplement: d0ra06916g1.pdf [file d0ra06916g1.pdf]

## Supplementary Information

### pH-sensitive Magnetite Mesoporous Silica nanocomposites

### for Controlled Drug Delivery and Hyperthermia<sup>†</sup>

*Hasan Keshavarz<sup>‡</sup>, Alireza Khavandi<sup>‡</sup>, Somaye Alamolhoda<sup>\*†</sup>, M. Reza Naimi-Jamal<sup>§</sup>*

*<sup>‡</sup>School of Metallurgy and Materials Engineering, Iran University of Science and Technology, P.O. Box 13114-16846, Tehran, Iran*

*<sup>§</sup>Research Laboratory of Green Organic Synthesis & Polymers, Department of Chemistry, Iran University of Science and Technology, P.O. Box 13114-16846, Tehran, Iran*

*\* Address correspondence to: [alamolhoda@iust.ac.ir](mailto:alamolhoda@iust.ac.ir)*

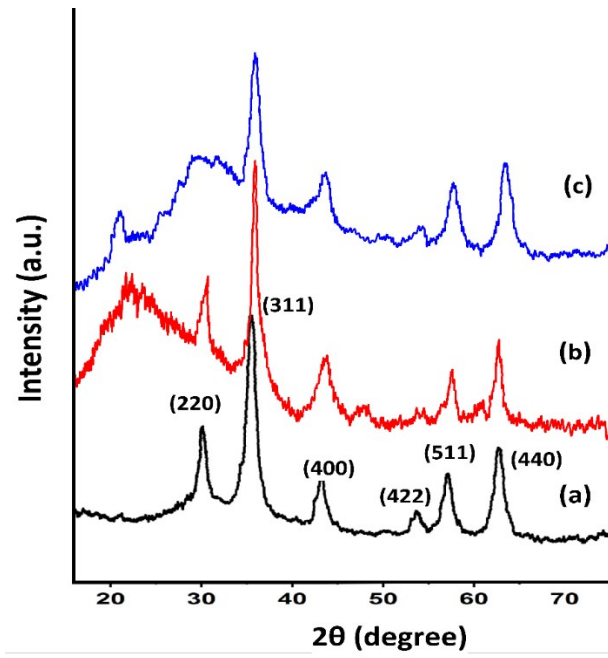

Figure S1. XRD pattern for (a) magnetite (b) magnetite mesoporous silica nanoparticles (c) MMSN@CS hydrogel

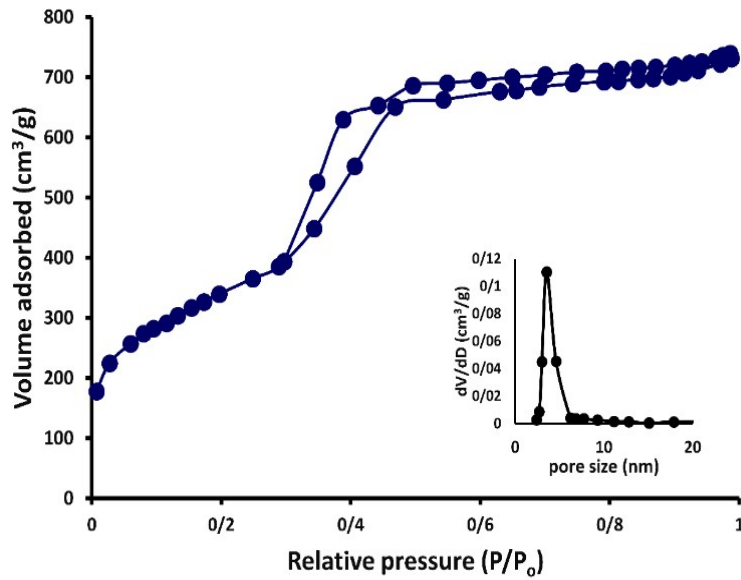

Figure S2. (a)  $N_2$  adsorption / desorption isotherm (b) Pore size distribution curve (BJH method) of MMSN particles before drug loading

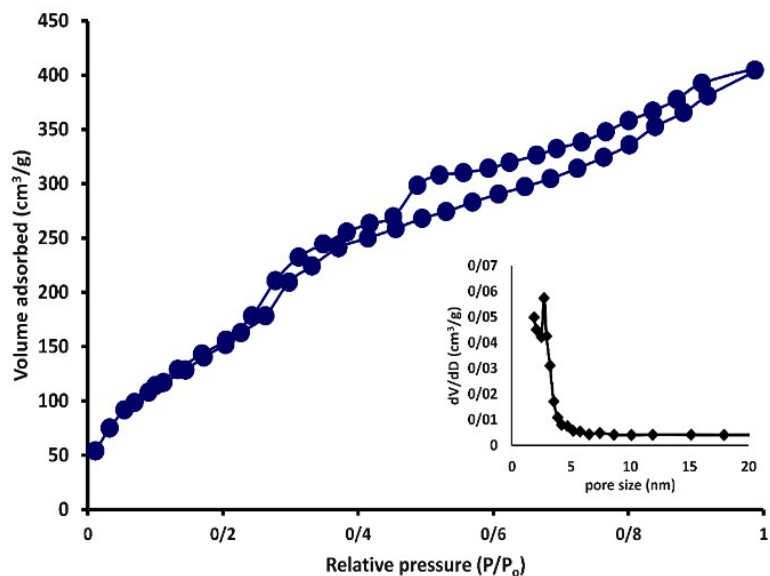

Figure S3. (a)  $N_2$  adsorption / desorption isotherm (b) Pore size distribution curve (BJH method) of MMSN particles after drug loading

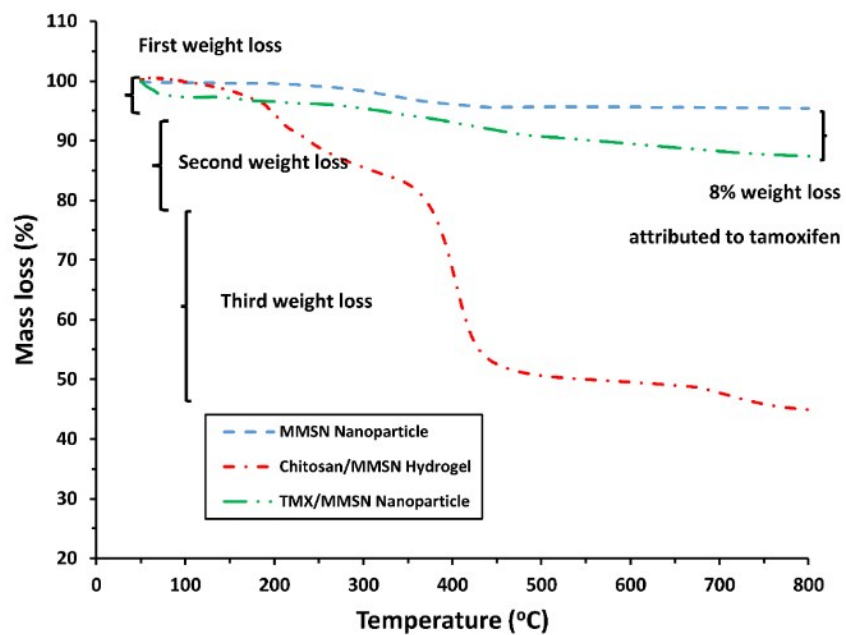

Figure S4. TGA graphs of MMSN before and after drug loading and MMSN@CS hydrogel

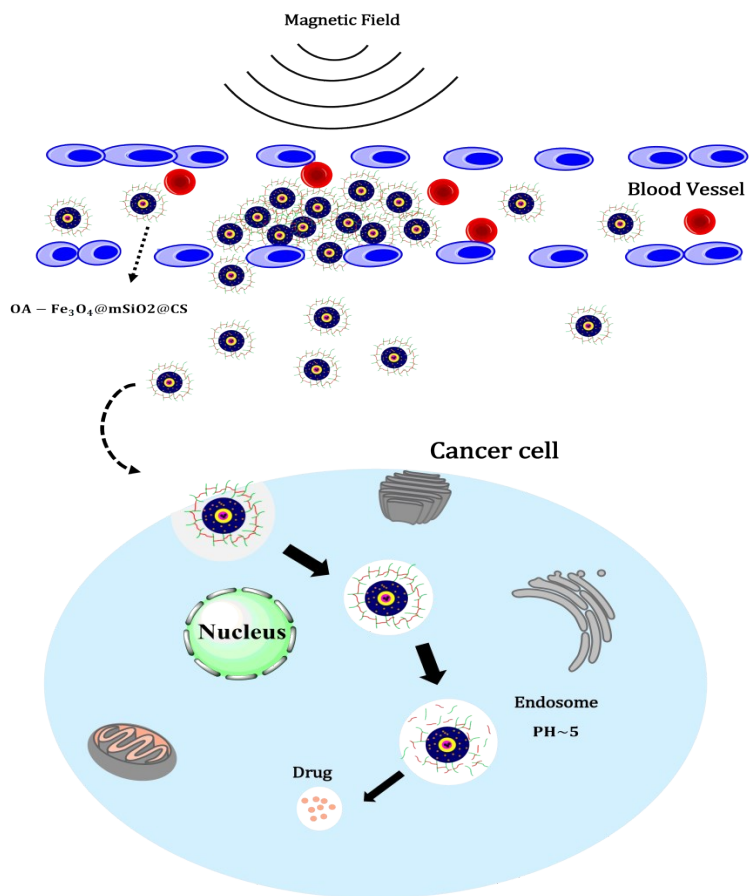

**Figure S5.** Scheme of the circulation of chitosan hydrogel in the body
